# Supplementary material for: Simulating the roles of crevasse routing of surface water and basal friction on the surge evolution of Basin 3, Austfonna ice cap
Source: Copernicus journal article supplement (doi:10.5194/tc-12-1563-2018), 2018-05-03
Supplement: Supplementary file 1 [file tc-12-1563-2018-supplement.zip]

Archive with 8 entries (8 files):
- radoNan.m
- T35XMJ_20170926T114819_B02sub.tif
- relaxLabelling.m
- crevasseDetection.m
- tc-12-1563-2018-supplement-title-page.pdf
- vecCompat.m
- radonIce.m
- T35XMJ_20170926T114819_MSK.tif
