# Supplementary material for: Simulating the roles of crevasse routing of surface water and basal friction on the surge evolution of Basin 3, Austfonna ice cap
Source: Copernicus journal article supplement (doi:10.5194/tc-12-1563-2018), 2018-05-03
Supplement: Supplementary file 1 [file tc-12-1563-2018-supplement.zip › tc-12-1563-2018-supplement-title-page.pdf]

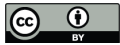

## *Supplement of*

# **Simulating the roles of crevasse routing of surface water and basal friction on the surge evolution of Basin 3, Austfonna ice cap**

**Yongmei Gong et al.**

*Correspondence to:* Yongmei Gong (yongmei.gong@helsinki.fi)

- tc-12-1563-2018-supplement-title-page.pdf
- T35XMJ\_20170926T114819\_B02sub.tif
- T35XMJ\_20170926T114819\_MSK.tif
- crevasseDetection.m
- radoNan.m
- radonIce.m
- relaxLabelling.m
- vecCompat.m

The copyright of individual parts of the supplement might differ from the CC BY 4.0 License.
