# Supplementary figures and images for: Simulating the roles of crevasse routing of surface water and basal friction on the surge evolution of Basin 3, Austfonna ice cap
Source: Copernicus journal article supplement (doi:10.5194/tc-12-1563-2018), 2018-05-03

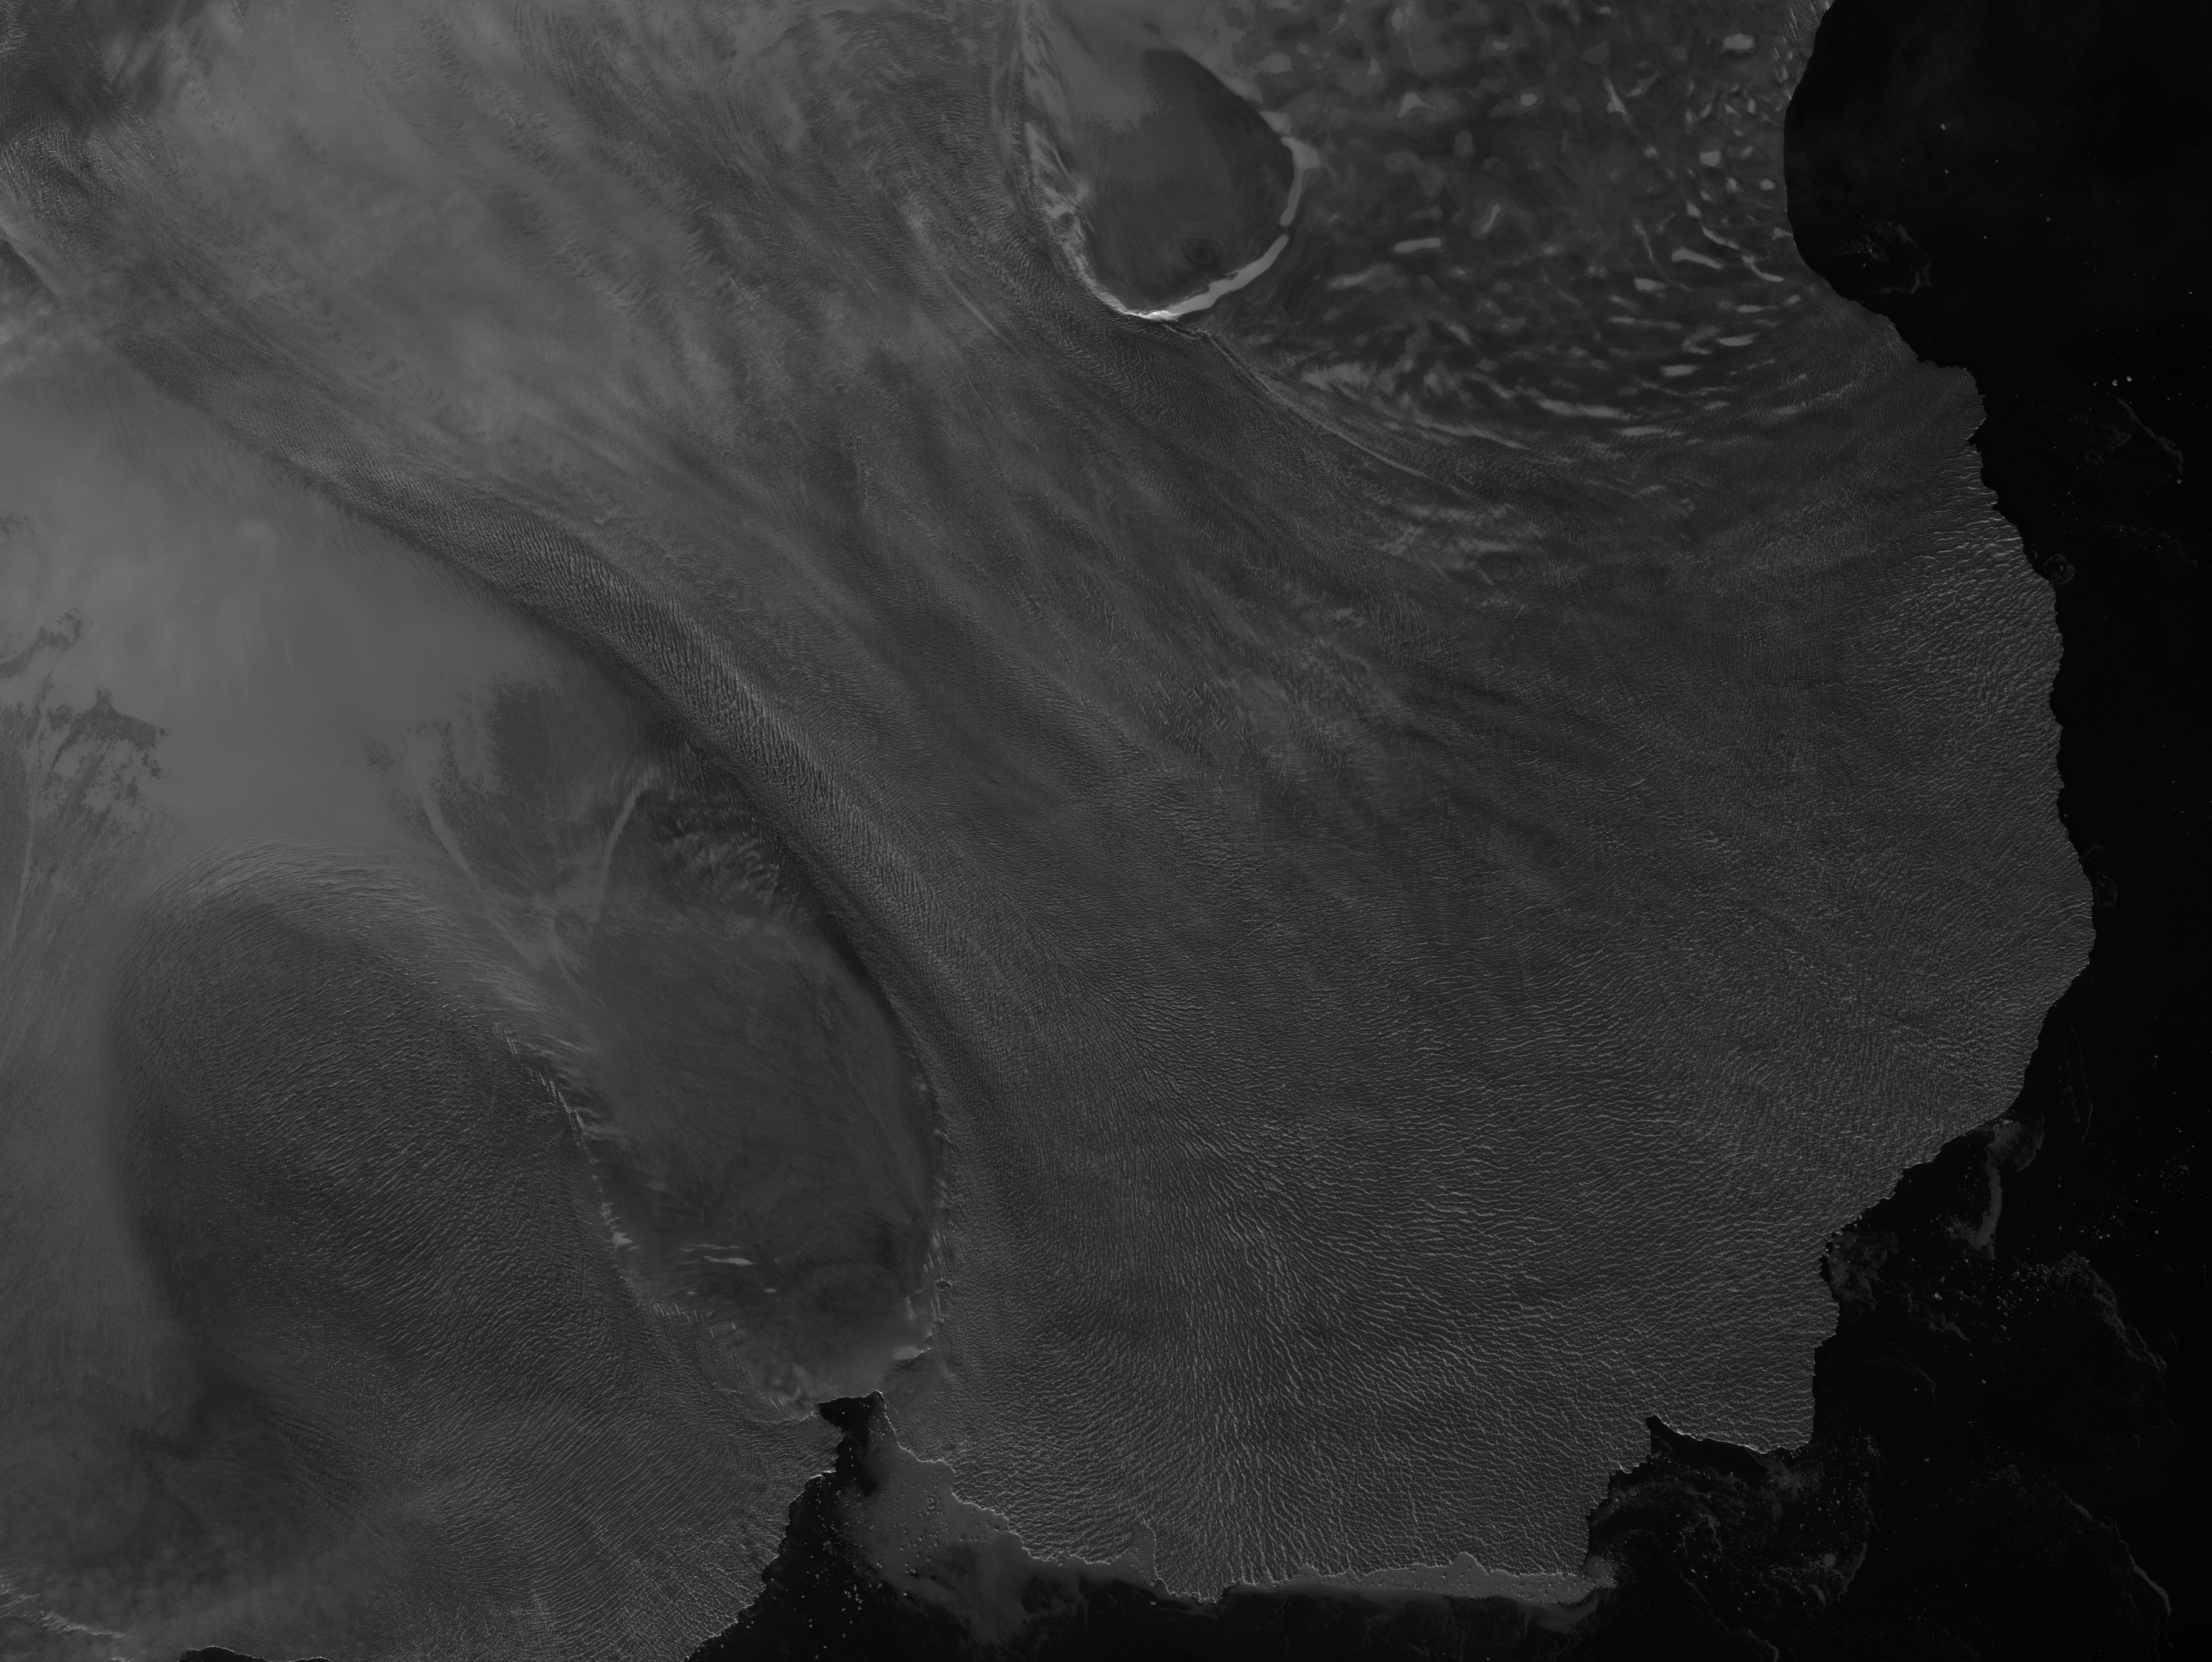

Supplement: Supplementary file 1 [file tc-12-1563-2018-supplement.zip › T35XMJ_20170926T114819_B02sub.tif]
